# Supplementary material for: Digital inequalities in health information seeking behaviors and experiences in the age of web 2.0: A population-based study in Hong Kong
Source: PubMed Central journal article supplement (PMC8009409; doi:10.1371/journal.pone.0249400), 2021-03-30
Supplement: pone.0249400.s002.pdf [file pone.0249400.s002.pdf]

Chinese version of the two-item Patient Health Questionnaire (PHQ-2)

In the past 2 weeks, how often are you troubled by the following problems? [Read out each option]

過去兩個星期，你有幾經常受到以下問題困擾？[讀出各項]

|                                                                                                   | Never<br>完全沒有 | Less than<br>7 days<br>少於 7 日 | 7 days or<br>more<br>7 日或以<br>上 | Nearly<br>daily<br>近乎每日 | Refuse to<br>answer<br>拒絕回答 |
|---------------------------------------------------------------------------------------------------|---------------|-------------------------------|---------------------------------|-------------------------|-----------------------------|
| a. Feel tired of doing anything, or don't even want to do anything at all.<br>做任何事都覺得沉悶或者根本唔想做任何事 | 0             | 1                             | 2                               | 3                       | -99                         |
| b. Feel downhearted, depressed or desperate.<br>情緒低落、抑鬱或者絕望                                       | 0             | 1                             | 2                               | 3                       | -99                         |
